# Supplementary material
Source: PubMed Central journal article supplement (PMC3434240)

# Supplementary Information

## Total Synthesis of ( $\pm$ )-Sorocenol B Employing Nanoparticle Catalysis

Huan Cong and John A. Porco, Jr.\*

*Department of Chemistry and Center for Chemical Methodology and Library  
Development (CMLD-BU), Boston University, 590 Commonwealth Avenue,  
Boston, Massachusetts 02215, USA.*

*E-mail: porco@bu.edu*

### Table of Contents

|                                                                               |            |
|-------------------------------------------------------------------------------|------------|
| <b>I. General Information.....</b>                                            | <b>S2</b>  |
| <b>II. Experimental Procedures and Compound Characterization.....</b>         | <b>S3</b>  |
| <b>III. Biological Data for Synthetic (<math>\pm</math>)-Sorocenol B.....</b> | <b>S13</b> |
| <b>IV. Select NMR Spectra.....</b>                                            | <b>S17</b> |

## I. General Information

### A. Instrumentation and methods

<sup>1</sup>H NMR spectra were recorded at 400 or 500 MHz at ambient temperature with CDCl<sub>3</sub> (Cambridge Isotope Laboratories, Inc.) as the solvent unless otherwise stated. <sup>13</sup>C NMR spectra were recorded at 100 or 125 MHz at ambient temperature with CDCl<sub>3</sub> as the solvent unless otherwise stated. Chemical shifts are reported in parts per million relative to CDCl<sub>3</sub> (<sup>1</sup>H, δ 7.24; <sup>13</sup>C, δ 77.0). Data for <sup>1</sup>H NMR are reported as follows: chemical shift, integration, multiplicity (br = broad, ovrlp = overlapping, s = singlet, d = doublet, t = triplet, q = quartet, m = multiplet) and coupling constants. All <sup>13</sup>C NMR spectra were recorded with complete proton decoupling. Infrared spectra were recorded on a Nicolet Nexus 670 FT-IR spectrophotometer. High-resolution mass spectra were obtained at the Boston University Chemical Instrumentation Center using a Waters Q-TOF mass spectrometer. Melting points were recorded on a Mel-temp apparatus (Laboratory Devices). Analytical liquid chromatography was performed using a Waters ACQUITY UPLC<sup>®</sup> system equipped with PDA, ELS, and SQ detectors. Analytical thin layer chromatography (TLC) was performed using 0.25 mm silica gel 60-F plates. Flash chromatography was performed using 200-400 mesh silica gel (Sorbent Technologies, Inc.). Preparative TLC was conducted with glass backed 250 μm or 1000 μm silica gel 60-F plates (Silicycle, Inc.) Yields refer to chromatographically and spectroscopically pure compounds, unless otherwise stated. Diels-Alder reactions were conducted in Teflon<sup>®</sup> capped, heavy wall sealed vials (Chemglass CG-1880, 15 mL or CG-4920-01 Complete Package) to minimize solvent/reagent evaporation. All other reactions were carried out in flame-dried glassware under an argon/nitrogen atmosphere unless otherwise noted. The Arthur<sup>™</sup> Suite Reaction Planner (Symyx Technologies, Inc.) was used for experimental procedure planning.

### B. Chemical reagents and solvents

HPLC grade tetrahydrofuran, methylene chloride, diethyl ether, toluene, acetonitrile, and benzene were purchased from Fisher and VWR and were purified and dried by passing through a PURE SOLV<sup>®</sup> solvent purification system (Innovative Technology, Inc.). Silica-supported silver nanoparticle (AgNP) catalyst was prepared according to our earlier studies.<sup>S1</sup> Chemical reagents were purchased from Strem, Aldrich, Acros, TCI America, and Alfa Aesar and were used as received.

---

<sup>S1</sup> Cong, H.; Becker, C. F.; Elliott, S. J.; Grinstaff, M. W.; Porco, J. A. *J. Am. Chem. Soc.* **2010**, *132*, 7514.

## II. Experimental Procedures and Compound Characterization

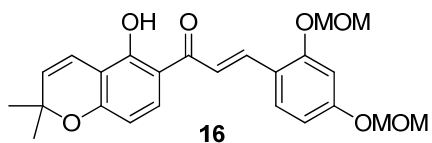

**2'-Hydroxychalcone 16.** To a stirred solution of acetophenone **13**<sup>S2</sup> (402.4 mg, 1.84 mmol, 1.0 equiv.) and benzaldehyde **15**<sup>S3</sup> (419.3 mg, 1.85 mmol, 1.01 equiv.) in THF (12 mL) was added NaH (60% dispersion in mineral oil, 162 mg, 4.05 mmol, 2.2 equiv.) at 0 °C. The reaction mixture was slowly warmed to room temperature and stirred for 48 h before it was quenched by water. The resulting yellow suspension was neutralized to pH 5 by 2 M HCl, extracted with EtOAc, washed with brine, dried over Na<sub>2</sub>SO<sub>4</sub>, and concentrated *in vacuo*. Purification on silica gel (15% EtOAc in hexanes) afforded the title compound **16** (754 mg, 96% yield) as an orange solid.

mp: 85-87 °C; R<sub>f</sub>: 0.70 (30% EtOAc in hexanes);

<sup>1</sup>H NMR (500 MHz, CDCl<sub>3</sub>) δ 13.84 (1H, s), 8.16 (1H, d, *J* = 15.5 Hz), 7.69 (1H, d, *J* = 9.5 Hz), 7.58 (1H, d, *J* = 8.5 Hz), 7.54 (1H, d, *J* = 15.5 Hz), 6.84 (1H, d, *J* = 2.0 Hz), 6.74 (1H, d, *J* = 10.0 Hz), 6.72 (1H, dd, *J* = 8.5 Hz, 2.5 Hz), 6.35 (1H, d, *J* = 9.0 Hz), 5.57 (1H, d, *J* = 10.5 Hz), 5.26 (2H, s), 5.18 (2H, s), 3.50 (3H, s), 3.47 (3H, s), 1.44 (6H, s); <sup>13</sup>C NMR (125 MHz, acetone-*d*<sub>6</sub>) δ 193.4, 161.82, 161.76, 160.4, 158.9, 140.0, 132.2, 130.8, 129.3, 119.3, 119.1, 116.3, 115.0, 110.4, 110.0, 108.9, 104.1, 95.7, 95.1, 78.5, 56.7, 56.4, 28.5; IR ν<sub>max</sub> (film): 2973, 1635, 1559, 1154, 1118 cm<sup>-1</sup>; HRMS (ESI+) *m/z* calculated for C<sub>24</sub>H<sub>26</sub>O<sub>7</sub> (M + H<sup>+</sup>) 427.1757, found 427.1750.

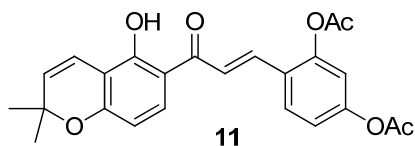

**2'-Hydroxychalcone 11.** To a stirred suspension of chalcone **16** (finely ground, 505.2 mg, 1.18 mmol, 1.0 equiv.) in MeOH (20 mL) was slowly added 3 M HCl (8 mL) at room temperature (25 °C). The reaction was refluxed at 80 °C for 20 min. To the resulting orange solution was slowly added 4 M NaOH (12 mL) at 0 °C and the reaction was stirred at room

<sup>S2</sup> Bandarakayake, W. M.; Crombie, L.; Whiting, D. A. *Chem. Comm.* **1969**, 970.

<sup>S3</sup> Cong, H.; Ledbetter, D.; Rowe, G. T.; Caradonna, J. P.; Porco, J. A. *J. Am. Chem. Soc.* **2008**, *130*, 9214.

temperature (25 °C) for 2 h. The reaction mixture was diluted with saturated aqueous NH<sub>4</sub>Cl, adjusted to pH 4 by adding 1 M HCl, and extracted with ethyl acetate. The organic layer was successively washed with water, brine, dried over anhydrous Na<sub>2</sub>SO<sub>4</sub>, and evaporated under reduced pressure. The dark red residue was dissolved in pyridine (0.400 mL, 4.95 mmol, 4.2 equiv.) and CH<sub>2</sub>Cl<sub>2</sub> (20 mL) under Ar. To the resulting orange solution was slowly added acetic anhydride (0.400 mL, 4.24 mmol, 3.6 equiv.) at 0 °C. The reaction mixture was kept at 0 °C for 1 h before being warmed to room temperature (25 °C) and stirred for 8 h. The reaction mixture was neutralized with 1 M HCl, extracted with ethyl acetate, washed with brine, and concentrated *in vacuo*. Purification on silica gel (15-20% EtOAc in hexanes) afforded the title compound **11** (396 mg, 79%) as a yellow solid.

mp: 132-133 °C; R<sub>f</sub>: 0.45 (33% EtOAc in hexanes);

<sup>1</sup>H NMR (500 MHz, CDCl<sub>3</sub>) δ 13.52 (1H, s), 7.87 (1H, d, *J* = 15.5 Hz), 7.74 (1H, d, *J* = 8.5 Hz), 7.65 (1H, d, *J* = 9.0 Hz), 7.50 (1H, d, *J* = 15.5 Hz), 7.07 (1H, dd, *J* = 8.0 Hz, 2.0 Hz), 7.01 (1H, d, *J* = 2.0 Hz), 6.73 (1H, d, *J* = 10.0 Hz), 6.36 (1H, d, *J* = 8.5 Hz), 5.58 (1H, d, *J* = 10.0 Hz), 2.38 (3H, s), 2.29 (3H, s), 1.45 (6H, s); <sup>13</sup>C NMR (125 MHz, CDCl<sub>3</sub>) δ 191.4, 168.7, 168.6, 161.0, 160.0, 152.4, 150.1, 136.5, 130.6, 128.15, 128.14, 125.2, 122.3, 119.6, 116.7, 115.7, 113.9, 109.4, 108.4, 28.3, 21.1, 21.0; IR ν<sub>max</sub> (film): 2978, 1772, 1652, 1576, 1496, 1150 cm<sup>-1</sup>; HRMS (ESI+) *m/z* calculated for C<sub>24</sub>H<sub>22</sub>O<sub>7</sub> (M + H<sup>+</sup>) 423.1444, found 423.1463.

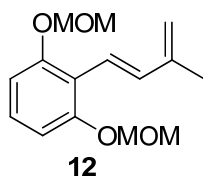

**Diene 12.** NaHMDS (2.00 mL, 1M solution in THF, 2.00 mmol, 1.02 equiv.) was added to a suspension of methyltriphenylphosphonium bromide (0.702 g, 1.96 mmol, 1.0 equiv.) in THF (5 mL) at 25 °C under Ar. The mixture was heated at 65 °C for 1.5 h before unsaturated ketone **19**<sup>S4</sup> was added with the aid of 5 mL THF. The reaction was further stirred at 65 °C for 4 h. The reaction mixture was neutralized with 1 M HCl, extracted with ethyl acetate, washed with brine, and concentrated *in vacuo*. Purification on silica gel (5% EtOAc in hexanes) afforded the title diene **12** (409 mg, 79%) as a light yellow oil.

*Note:* This compound is unstable and may be volatile with prolonged treatment under high

<sup>S4</sup> Ballerini, E.; Minuti, L.; Piermatti, O. *J. Org. Chem.* **2010**, *75*, 4251.

vacuum. It is best to use it when freshly prepared. Alternatively, it can be stored in ~1 M solution in hexanes in the dark at 4 °C for at least one week without noticeable degradation.

R<sub>f</sub>: 0.50 (20% EtOAc in hexanes);

<sup>1</sup>H NMR (500 MHz, CDCl<sub>3</sub>) δ 7.28 (1H, d, *J* = 16.5 Hz), 7.07 (1H, t, *J* = 8.2 Hz), 6.82 (1H, d, *J* = 16.5 Hz), 6.78 (2H, d, *J* = 8.5 Hz), 5.20 (4H, s), 5.06 (1H, m), 5.03 (1H, m), 3.48 (6H, s), 1.98 (3H, s); <sup>13</sup>C NMR (125 MHz, CDCl<sub>3</sub>) δ 156.0, 143.5, 136.1, 127.9, 119.8, 117.1, 116.6, 108.8, 94.9, 56.2, 18.3; IR ν<sub>max</sub> (film): 2955, 1592, 1466, 1154, 1043 cm<sup>-1</sup>; HRMS (ESI+) *m/z* calculated for C<sub>15</sub>H<sub>20</sub>O<sub>4</sub> (M + H<sup>+</sup>) 265.1440, found 265.1448.

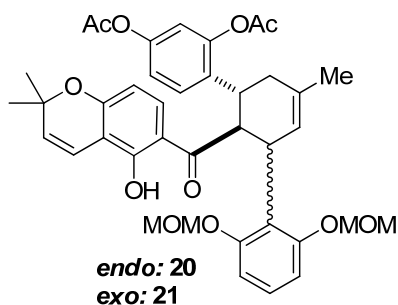

**Cycloadducts (±)-20/21.** To a reaction vial equipped with a stirbar were added silica-supported AgNP catalyst (800 mg, containing 216 μg Ag, 0.1 mol% Ag loading), chalcone **11** (300.0 mg, 0.71 mmol, 1.0 equiv.), diene **12** (478 mg, 1.81 mmol, 2.6 equiv.), and CH<sub>2</sub>Cl<sub>2</sub> (6.0 mL) in air. The vial was sealed with a Teflon<sup>®</sup> cap. After stirred at 50 °C for 48 h, the reaction mixture was filtered and concentrated *in vacuo*. Chalcone **11** was fully converted to the desired cycloadducts as determined by crude <sup>1</sup>H NMR. Purification using silica gel (15–30% EtOAc in hexanes) afforded *endo* cycloadduct **20** (280.5 mg, 58%) as a light yellow solid, followed by *exo* cycloadduct **21** (160 mg, 32%) as light yellow film.

*Uncatalyzed, thermal Diels-Alder cycloaddition of chalcone 11 and diene 12:* To a reaction vial equipped with a stirbar were added chalcone **11** (20.9 mg, 0.050 mmol, 1.0 equiv.), diene **12** (146.8 mg, 0.56 mmol, 11 equiv.), and CH<sub>2</sub>Cl<sub>2</sub> (1.0 mL) in air. The vial was sealed with a Teflon<sup>®</sup> cap. After stirred at 50 °C for 48 h, the reaction crude was concentrated *in vacuo* and analyzed by <sup>1</sup>H NMR, showing 53% conversion of chalcone **11** to cycloadducts **20** and **21** (**20:21** ratio = 1:2).

The stereochemistry assignments for cycloadducts **20** and **21** were based on <sup>1</sup>H NMR spectra in comparison with related model compounds which were synthesized in our previous studies.<sup>S1, S3</sup> The stereochemistry for **20** was also confirmed by key NOE signals (see below).

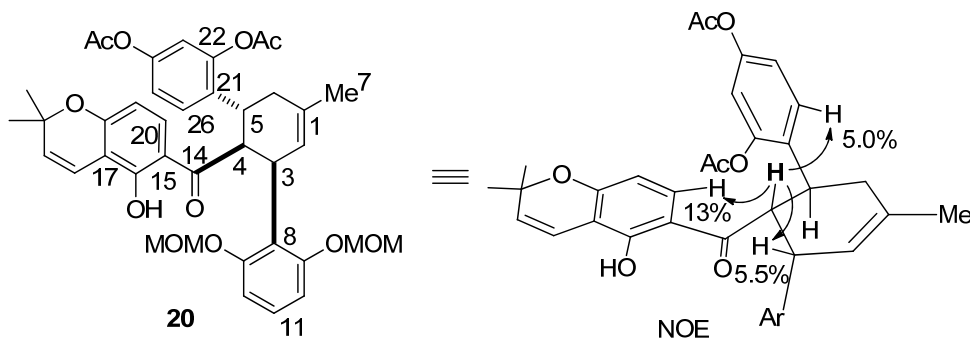

**Compound 20:** m.p. >150 °C,  $R_f$ : 0.45 (33% EtOAc in hexanes);

$^1\text{H}$  NMR (500 MHz, acetone- $d_6$ )  $\delta$  12.90 (1H, s), 7.86 (1H, d,  $J = 9.0$  Hz), 7.40 (1H, d,  $J = 8.5$  Hz), 7.00 (1H, t,  $J = 8.5$  Hz), 6.88 (1H, dd,  $J = 8.7$  Hz, 2.2 Hz), 6.85 (1H, d,  $J = 2.5$  Hz), 6.64 (2H, d,  $J = 8.5$  Hz), 6.50 (1H, d,  $J = 10.0$  Hz), 6.26 (1H, d,  $J = 9.0$  Hz), 5.62 (1H, d,  $J = 10.0$  Hz), 5.48 (1H, s, br), 4.7-5.0 (4H, s, br), 4.65 (1H, m, br), 4.42 (1H, dd,  $J = 10.5$  Hz, 7.0 Hz), 4.25 (1H, ddd,  $J = 10.0$  Hz, 10.0 Hz, 6.0 Hz), 3.0-3.5 (6H, s, br), 2.51 (1H, dd,  $J = 17.5$  Hz, 6.7 Hz), 2.28 (3H, s), 2.19 (3H, s), 2.19 (1H, dd, ovlp,  $J = 17.5$  Hz, 9.5 Hz), 1.80 (3H, s), 1.40 (3H, s), 1.39 (3H, s); NOED (500 MHz, acetone- $d_6$ ) Irradiation at  $\delta$  4.42 (H-4): 5.5% enhancement at H-3, 13% enhancement at H-20, 5.0% enhancement at H-26;  $^{13}\text{C}$  NMR (125 MHz,  $\text{CDCl}_3$ )  $\delta$  205.3, 169.0, 168.9, 159.3, 158.8, 156.8, 148.8, 148.5, 135.2, 131.8, 130.6, 128.3, 127.9, 127.8, 122.7, 119.1, 118.8, 116.1, 116.0, 114.8, 108.9, 108.1, 107.3, 94.6, 77.3, 55.8, 48.2, 36.3, 34.1, 32.0, 28.2, 28.0, 23.4, 21.1, 21.0; IR  $\nu_{\text{max}}$  (film): 2965, 1772, 1616, 1465, 1210, 1115, 1043  $\text{cm}^{-1}$ ; HRMS (ESI+)  $m/z$  calculated for  $\text{C}_{39}\text{H}_{42}\text{O}_{11}$  ( $\text{M} + \text{H}^+$ ) 687.2805, found 687.2811.

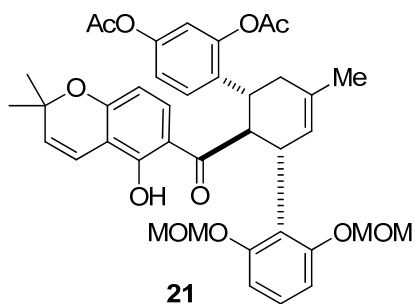

**Compound 21:**  $R_f$ : 0.40 (33% EtOAc in hexanes);

$^1\text{H}$  NMR (500 MHz, acetone- $d_6$ )  $\delta$  13.23 (1H, s), 7.39 (1H, d,  $J = 8.5$  Hz), 7.36 (1H, d,  $J = 9.0$  Hz), 6.95 (1H, t,  $J = 8.5$  Hz), 6.83 (2H, m), 6.72 (1H, d,  $J = 8.0$  Hz), 6.53 (1H, d,  $J = 8.0$  Hz), 6.45 (1H, d,  $J = 10.0$  Hz), 5.94 (1H, d,  $J = 9.0$  Hz), 5.57 (1H, d,  $J = 10.0$  Hz), 5.41 (1H,

d,  $J = 6.5$  Hz), 5.32 (1H, s, br), 5.30 (1H, d,  $J = 6.0$  Hz), 4.97 (1H, d,  $J = 7.0$  Hz), 4.84 (1H, d,  $J = 7.0$  Hz), 4.71 (1H, s, br), 4.47 (1H, m, br), 3.79 (1H, s, br), 3.58 (3H, s), 3.33 (3H, s), 2.41 (3H, s), 2.37 (1H, m, br), 2.21 (1H, dd,  $J = 18.0$  Hz, 5.0 Hz), 2.16 (3H, s), 1.75 (3H, s), 1.33 (6H, s);  $^{13}\text{C}$  NMR (125 MHz,  $\text{CDCl}_3$ )  $\delta$  207.3, 169.1, 168.8, 159.3, 159.2, 156.5, 155.9, 148.8, 148.5, 133.5, 131.1, 130.8, 128.1, 127.52, 127.51, 124.6, 120.5, 119.0, 116.2, 115.9, 114.9, 108.43, 108.39, 108.2, 107.3, 94.9, 77.4, 56.3, 55.8, 47.2, 38.2, 37.8, 35.9, 28.20, 28.18, 23.1, 21.2, 21.1; IR  $\nu_{\text{max}}$  (film): 2967, 1769, 1613, 1199, 1041  $\text{cm}^{-1}$ ; HRMS (ESI+)  $m/z$  calculated for  $\text{C}_{39}\text{H}_{42}\text{O}_{11}$  ( $\text{M} + \text{H}^+$ ) 687.2805, found 687.2816.

### Deacetylation and Pd(II)-catalyzed oxidative cyclization of **20**.

To a reaction vial was added **20** (15.9 mg, 0.0232 mmol, 1.0 equiv.),  $\text{Na}_2\text{CO}_3$  (100 mg, 0.94 mmol, 40 equiv.), MeOH (1 mL) and water (0.5 mL) at 25 °C in air. The resulting yellow suspension was stirred at 25 °C in air for 12 h. The reaction mixture was neutralized with 1 M HCl, extracted with ethyl acetate, washed with brine, and concentrated *in vacuo*. The crude product **9** was used directly in the next step.

To a separate heavy wall reaction vial (Chemglass CG-4920-01 Complete Package) were added  $\text{Pd}(\text{OAc})_2$  (1.1 mg, 0.0049 mmol, 21 mol%), pyridine (0.75  $\mu\text{L}$ , 0.0093 mmol, 40 mol%), and toluene (0.5 mL) under 1 atm  $\text{O}_2$ . The mixture was stirred at 25 °C for 5 min before crude **9** was added with the aid of toluene (0.5 mL). The vial was sealed with a Teflon<sup>®</sup> cap. After stirred at 80 °C for 24 h, the reaction mixture was filtered through a short Celite<sup>®</sup> pad with the aid of ethyl acetate, and concentrated *in vacuo*. Purification using silica gel afforded 7.0 mg of a 2:1 mixture of **8** and **22** (50% yield, two steps). Further separation of **8** and **22** was achieved using preparative TLC (20% EtOAc in hexanes).

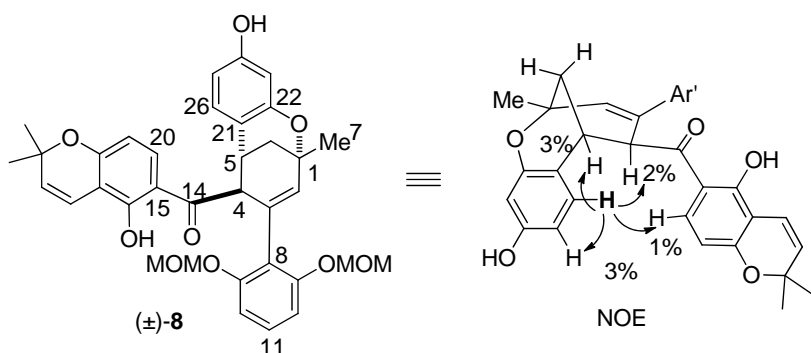

**Compound 8:** Light yellow oil.  $R_f$ : 0.40 (33% EtOAc in hexanes);

$^1\text{H}$  NMR (500 MHz,  $\text{CDCl}_3$ )  $\delta$  13.14 (1H, s), 7.33 (1H, d,  $J = 9.5$  Hz), 7.06 (1H, d,  $J = 8.0$

Hz), 6.97 (1H, t,  $J = 8.5$  Hz), 6.64 (1H, d,  $J = 10.0$  Hz), 6.56 (2H, d,  $J = 8.5$  Hz), 6.44 (1H, dd,  $J = 8.0$  Hz, 2.5 Hz), 6.27 (1H, d,  $J = 2.5$  Hz), 6.11 (1H, d,  $J = 8.5$  Hz), 5.69 (1H, s), 5.53 (1H, d,  $J = 10.0$  Hz), 5.28 (1H, s), 4.73 (2H, d,  $J = 6.5$  Hz), 4.68 (2H, d,  $J = 6.5$  Hz), 4.56 (1H, s, br), 3.30 (1H, m, br), 3.25 (6H, s), 2.69 (1H, dd,  $J = 13.0$  Hz, 2.2 Hz), 1.87 (1H, dd,  $J = 13.0$  Hz, 3.7 Hz), 1.60 (3H, s), 1.41 (3H, s), 1.39 (3H, s); NOED (500 MHz,  $\text{CDCl}_3$ ) Irradiation at  $\delta$  7.06 (H-26): 3% enhancement at H-25, 3% enhancement at H-5, 2 % enhancement at H-4, 1 % enhancement at H-20;  $^{13}\text{C}$  NMR (100 MHz,  $\text{CDCl}_3$ )  $\delta$  203.5, 160.1, 159.5, 155.3, 155.1, 134.1, 131.4, 130.8, 129.6, 128.8, 128.2, 120.5, 119.1, 115.7, 113.3, 109.2, 108.7, 108.0, 107.5, 103.7, 94.5, 77.7, 71.5, 55.8, 52.5, 35.1, 29.9, 28.2, 28.2, 27.0; IR  $\nu_{\text{max}}$  (film): 2926, 2360, 1617, 1461, 1211, 1115  $\text{cm}^{-1}$ ; HRMS (ESI+)  $m/z$  calculated for  $\text{C}_{35}\text{H}_{36}\text{O}_9$  ( $\text{M} + \text{Na}^+$ ) 623.2257, found 623.2268.

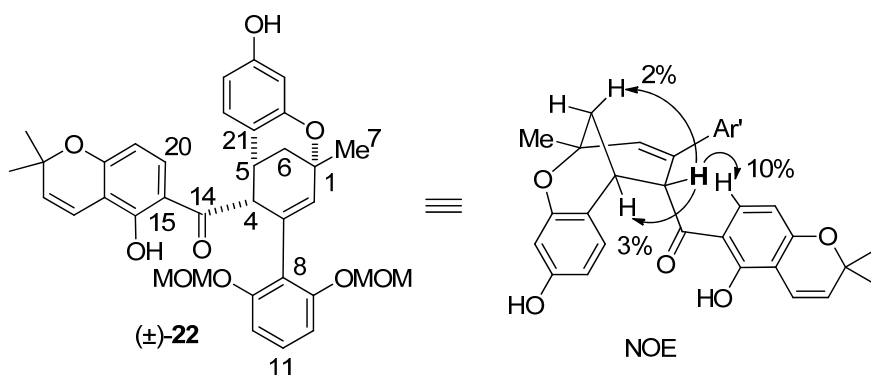

**Compound 22.** Light yellow oil.  $R_f$ : 0.40 (33% EtOAc in hexanes);

$^1\text{H}$  NMR (500 MHz,  $\text{CDCl}_3$ )  $\delta$  12.78 (1H, s), 7.76 (1H, d,  $J = 8.5$  Hz), 6.97 (1H, t,  $J = 8.2$  Hz), 6.65 (1H, d,  $J = 10.0$  Hz), 6.64 (2H, d,  $J = 8.5$  Hz), 6.36 (1H, d,  $J = 8.5$  Hz), 6.31 (2H, d,  $J = 2.5$  Hz), 6.28 (1H, d,  $J = 8.5$  Hz), 6.14 (1H, dd,  $J = 8.2$  Hz, 2.2 Hz), 5.88 (1H, m, br), 5.54 (1H, d,  $J = 10.0$  Hz), 5.31 (1H, s, br), 4.85 (2H, s, br), 4.78 (2H, s, br), 4.73 (1H, s), 3.42 (1H, s, br), 3.21 (6H, s), 2.23 (1H, dd,  $J = 12.5$  Hz, 2.0 Hz), 2.12 (1H, ddd,  $J = 12.5$  Hz, 4.0 Hz, 1.5 Hz), 1.55 (3H, s), 1.46 (3H, s), 1.42 (3H, s); NOED (500 MHz,  $\text{CDCl}_3$ ) Irradiation at  $\delta$  5.31 (H-4): 3% enhancement at H-5, 2% enhancement at H-6a, 10 % enhancement at H-20;  $^{13}\text{C}$  NMR (125 MHz,  $\text{CDCl}_3$ )  $\delta$  202.7, 160.0, 159.2, 155.7, 155.0, 134.1, 132.1, 131.1, 130.1, 128.1, 127.9, 121.6, 115.8, 114.3, 113.0, 109.7, 108.0, 106.9, 102.9, 95.2, 71.0, 56.0, 54.4, 36.4, 35.5, 28.4, 28.3, 27.2; IR  $\nu_{\text{max}}$  (film): 2929, 1617, 1506, 1457, 1117  $\text{cm}^{-1}$ ; HRMS (ESI+)  $m/z$  calculated for  $\text{C}_{35}\text{H}_{36}\text{O}_9$  ( $\text{M} + \text{Na}^+$ ) 623.2257, found 623.2250.



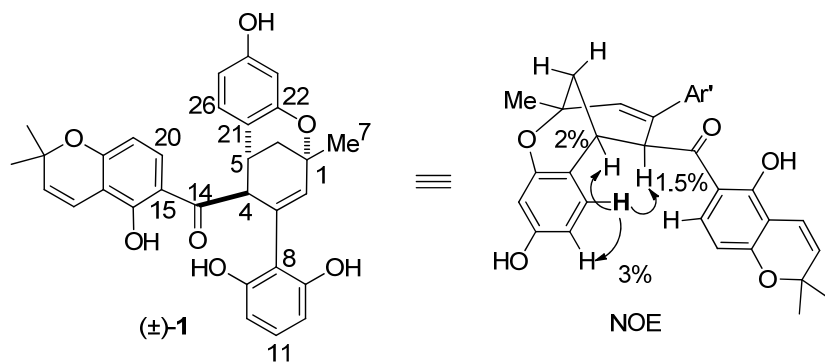

**(±)-sorocenol B (1).** To a stirred solution of MOM ether **8** (3.3 mg, 0.0055 mmol, 1.0 equiv.) in MeOH (0.5 mL) was slowly added 3 M HCl (0.3 mL) at room temperature (25 °C). The reaction was refluxed at 80 °C for 10 min. The reaction mixture was diluted with pH 7 buffer, extracted with ethyl acetate. The organic layer was washed with brine, dried over Na<sub>2</sub>SO<sub>4</sub>, and concentrated *in vacuo*. Purification on preparative TLC (33% EtOAc in hexanes) afforded the natural product (±)-**1** (2.1 mg, 74% yield) as a light yellow film.

R<sub>f</sub>: 0.30 (33% EtOAc in hexanes);

IR  $\nu_{\max}$  (film): 3380(br), 2926, 1599, 1465, 1362, 1116 cm<sup>-1</sup>; HRMS (ESI+) m/z calculated for C<sub>31</sub>H<sub>29</sub>O<sub>7</sub> (M + H<sup>+</sup>) 513.1913, found 513.1898.

NOED (500 MHz, CDCl<sub>3</sub>) Irradiation at  $\delta$  7.28 (H-26): 3% enhancement at H-25, 2% enhancement at H-5, 1.5 % enhancement at H-4.

**Table S1. <sup>1</sup>H NMR of Synthetic (±)-Sorocenol B in Comparison to Literature Data<sup>S5</sup>**

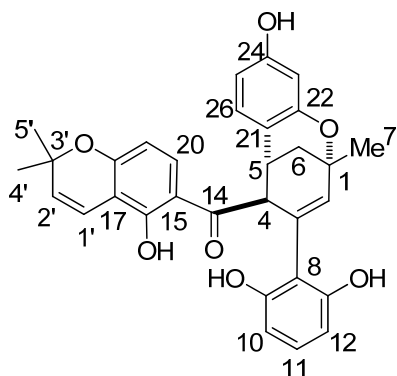

| Position | $\delta$ ( $J_{\text{H-H}}$ in Hz)        |                                          |
|----------|-------------------------------------------|------------------------------------------|
|          | literature (400 MHz, acetone- <i>d</i> 6) | synthetic (500 MHz, acetone- <i>d</i> 6) |
| 2        | 5.83 (s, br)                              | 5.82 (s)                                 |
| 4        | 4.97 (t-like, $J = 1.5$ )                 | 4.97 (s, br)                             |
| 5        | 3.43 (ddd, $J = 4, 2, 1.5$ )              | 3.43 (m, br)                             |
| 6a       | 1.81 (ddd, $J = 13, 4, 1.5$ )             | 1.81 (ddd, $J = 13.0, 4.0, 1.5$ )        |
| 6b       | 2.16 (dd, $J = 13, 2$ )                   | 2.15 (dd, $J = 13.5, 2.0$ )              |
| 7        | 1.61 (s)                                  | 1.61 (s)                                 |
| 10/12    | 6.27 (d, $J = 9$ )                        | 6.27 (d, $J = 8.0$ )                     |
| 11       | 6.87 (t, $J = 9$ )                        | 6.85 (t, $J = 8.0$ )                     |
| 19       | 6.52 (dd, $J = 9, 0.7$ )                  | 6.52 (d, $J = 9.0$ )                     |
| 20       | 8.01 (d, $J = 9$ )                        | 8.01 (d, $J = 8.5$ )                     |
| 23       | 6.24 (d, $J = 3$ )                        | 6.24 (d, $J = 2.5$ )                     |
| 25       | 6.42 (dd, $J = 9, 3$ )                    | 6.42 (dd, $J = 8.5, 2.5$ )               |
| 26       | 7.28 (d, $J = 9$ )                        | 7.28 (d, $J = 8.0$ )                     |
| 1'       | 6.65 (dd, $J = 10, 0.7$ )                 | 6.65 (d, $J = 10.0$ )                    |
| 2'       | 5.74 (d, $J = 10$ )                       | 5.74 (d, $J = 10.5$ )                    |
| 4'       | 1.46 (s)                                  | 1.46 (s)                                 |
| 5'       | 1.43 (s)                                  | 1.43 (s)                                 |
| 9/13-OH  | 7.32 (s)                                  | 7.32 (s)                                 |
| 16-OH    | 8.17 (s)                                  | 8.15 (s)                                 |
| 24-OH    | 12.78 (s)                                 | 12.78 (s)                                |

<sup>S5</sup> Hano, Y.; Yamanaka, J.; Nomura, T.; Momose, Y. *Heterocycles* **1995**, *41*, 1035.

**Table S2.  $^{13}\text{C}$  NMR of Synthetic ( $\pm$ )-Sorocenol B in Comparison to Literature Data<sup>S5</sup>**

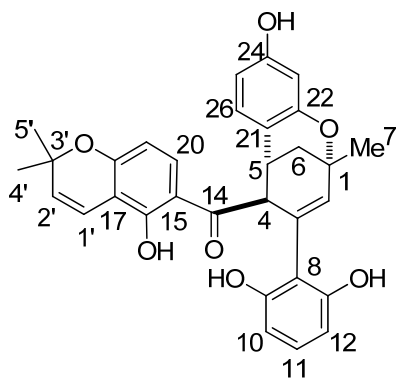

| Position | $\delta$ ( $J_{\text{H-H}}$ in Hz)        |                                          |
|----------|-------------------------------------------|------------------------------------------|
|          | literature (100 MHz, acetone- <i>d</i> 6) | synthetic (125 MHz, acetone- <i>d</i> 6) |
| 1        | 71.5                                      | 71.5                                     |
| 2        | 136.5                                     | 136.6                                    |
| 3        | 133.0                                     | 133.1                                    |
| 4        | 55.4                                      | 55.5                                     |
| 5        | 36.6                                      | 36.7                                     |
| 6        | 30.3                                      | 30.5                                     |
| 7        | 27.4                                      | 27.4                                     |
| 8        | 117.3                                     | 117.3                                    |
| 9/13     | 155.8                                     | 155.9                                    |
| 10/12    | 107.9                                     | 108.0                                    |
| 11       | 129.8                                     | 129.9                                    |
| 14       | 207.8                                     | 207.8                                    |
| 15       | 113.2                                     | 113.2                                    |
| 16       | 161.2                                     | 161.2                                    |
| 17       | 110.2                                     | 110.25                                   |
| 18       | 161.4                                     | 161.4                                    |
| 19       | 110.1                                     | 110.21                                   |
| 20       | 132.8                                     | 132.9                                    |
| 21       | 123.3                                     | 123.4                                    |
| 22       | 155.5                                     | 155.6                                    |
| 23       | 104.2                                     | 104.2                                    |
| 24       | 158.3                                     | 158.4                                    |
| 25       | 109.1                                     | 109.2                                    |
| 26       | 130.3                                     | 130.4                                    |

---

|    |       |       |
|----|-------|-------|
| 1' | 115.9 | 115.9 |
| 2' | 129.7 | 129.7 |
| 3' | 79.0  | 79.1  |
| 4' | 28.5  | 28.56 |
| 5' | 28.6  | 28.63 |

---

### ***III. Biological Data for Synthetic (±)-Sorocenol B***

#### **National Cancer Institute (NCI) 60-Cell Assay:<sup>S6</sup>**

Synthetic (±)-sorocenol B was evaluated according to current protocols in which they are first tested at  $10^{-5}$  M against all 60 tumor cell lines. Compounds where inhibition met threshold values were then tested in a dose-response format. Single-dose screening data for (±)-sorocenol B are shown in Figure S1. Full-dose data for (±)-sorocenol B are shown in Figures S2 and S3.

---

<sup>S6</sup> Shoemaker, R. H. *Nat. Rev. Cancer* **2006**, *6*, 813.

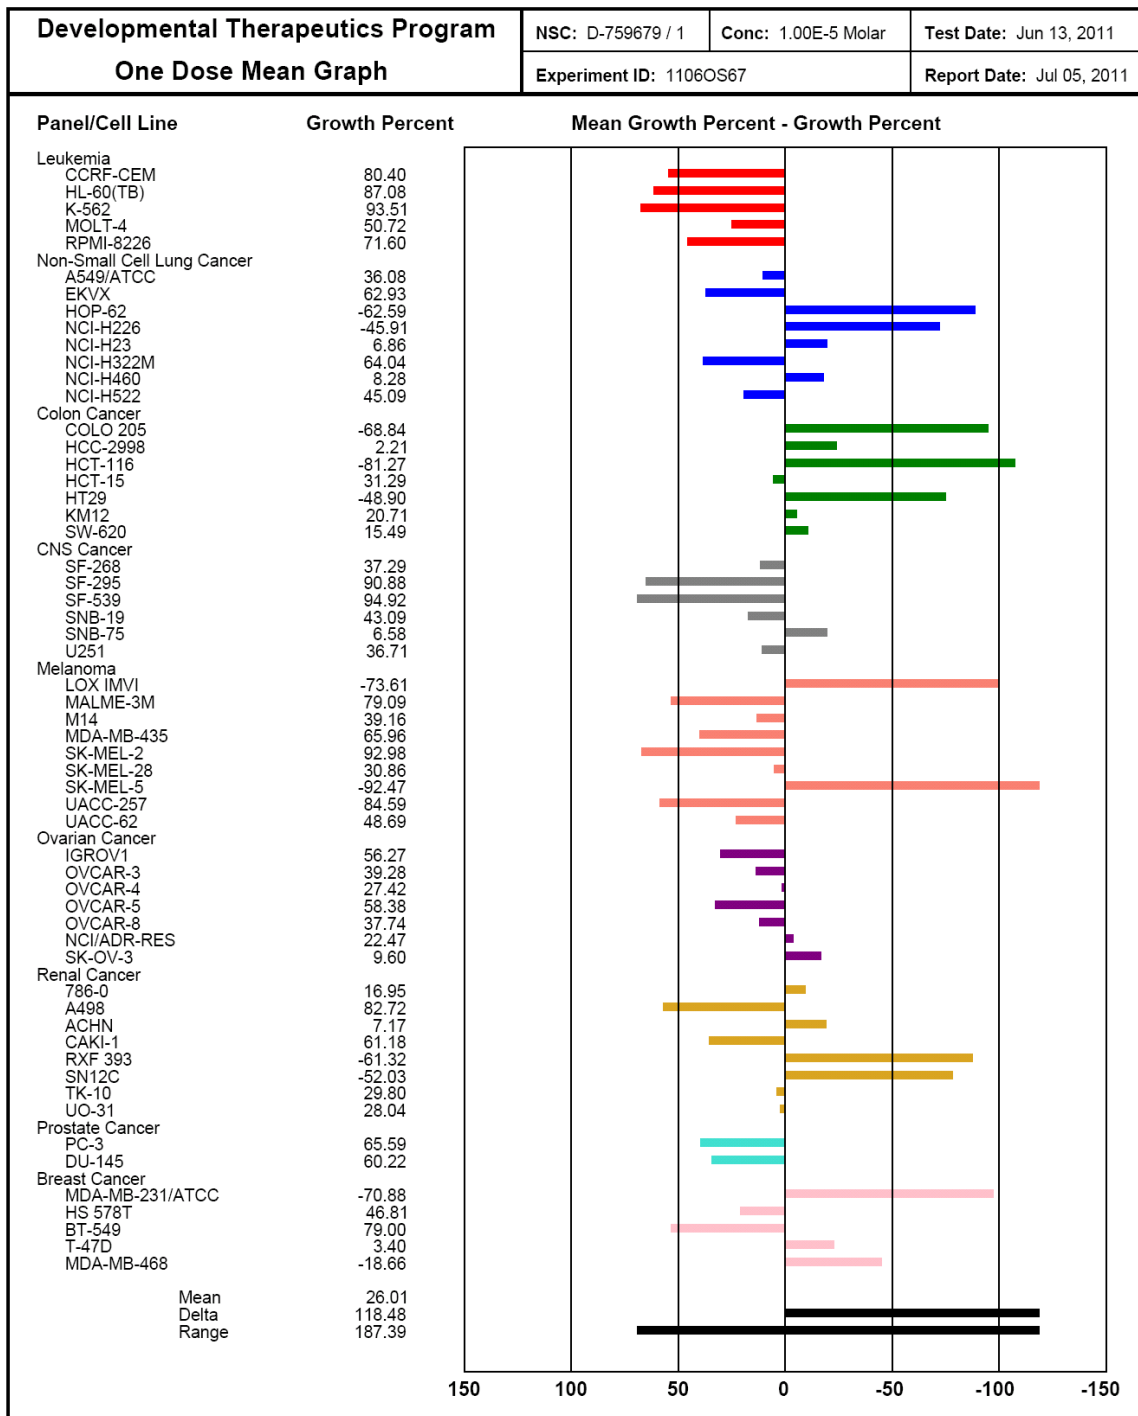

Figure S1. Single-dose data for (±)-sorocenol B.

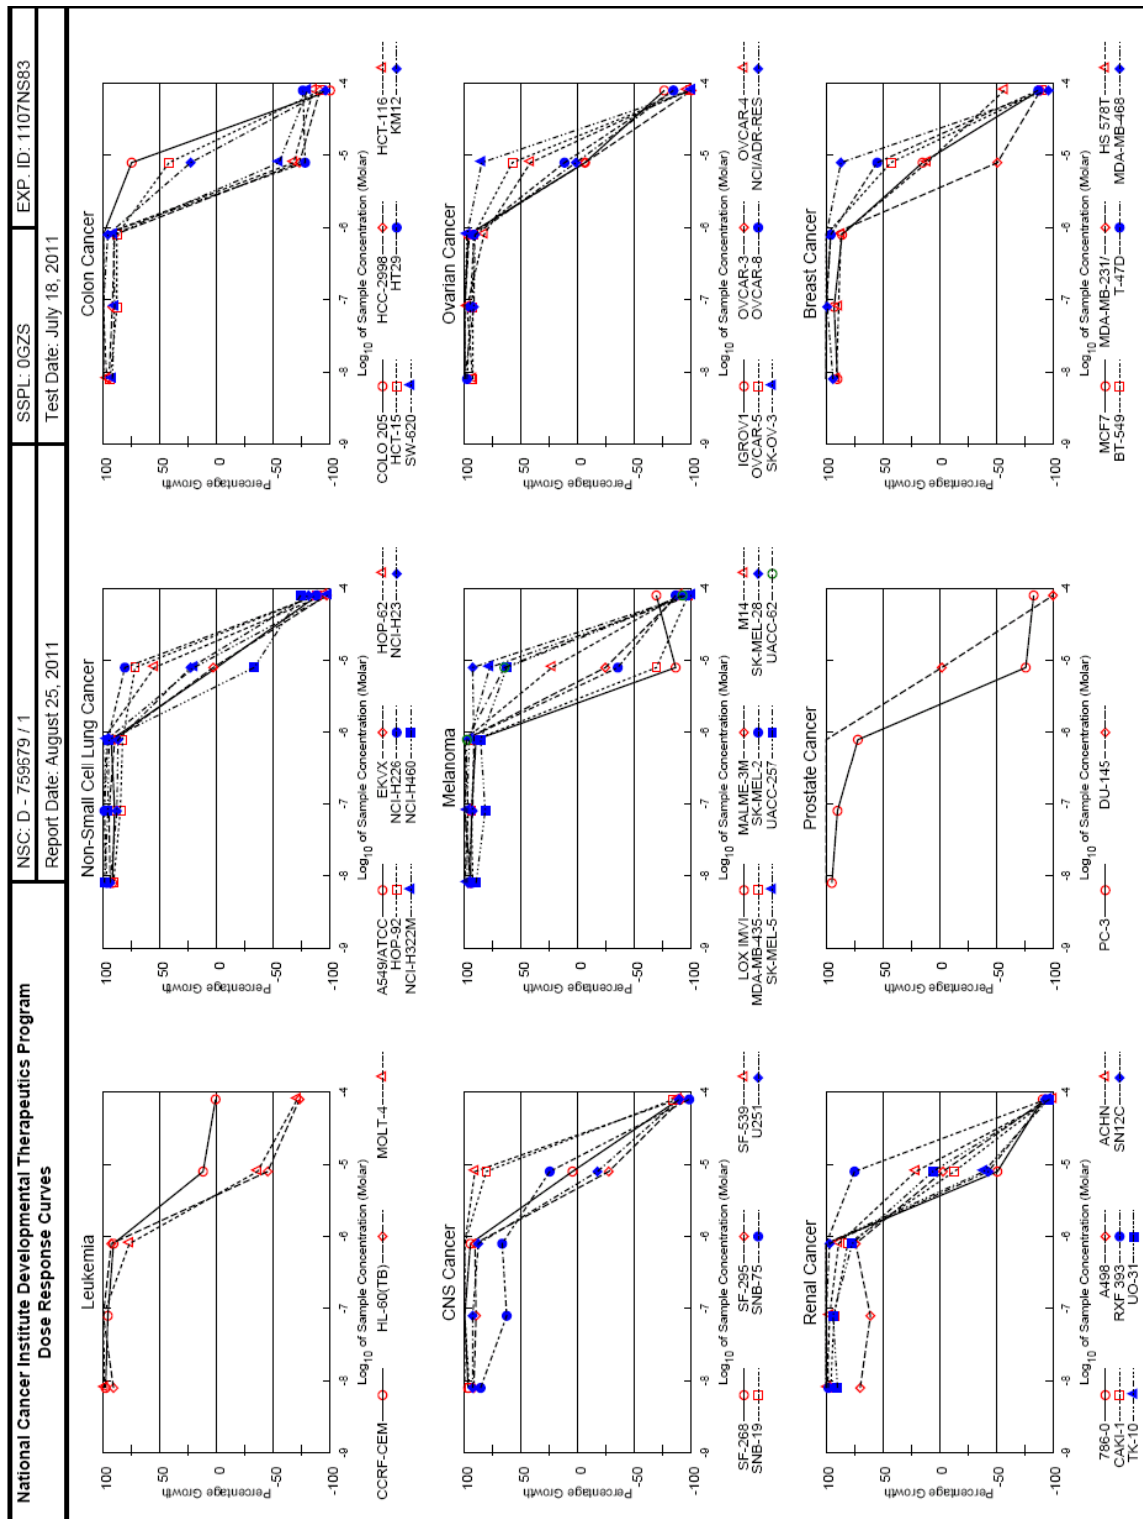

Figure S2. Full dose response curves for (+)-sorocenol B.

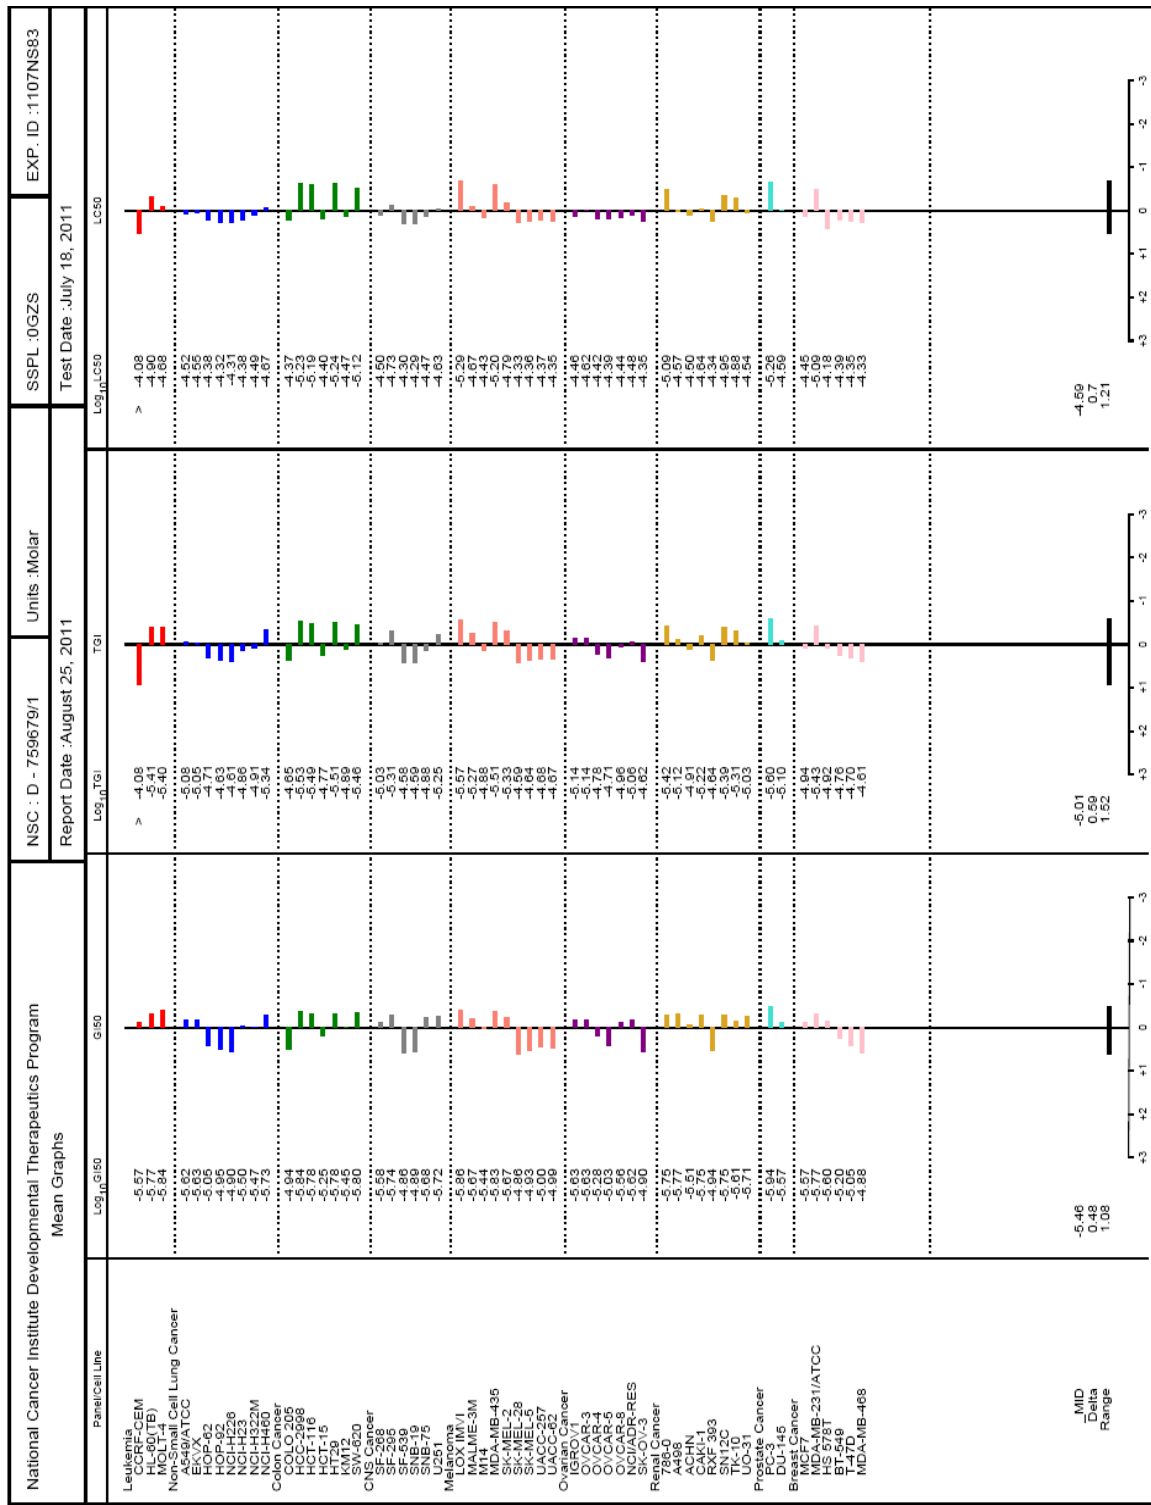

Figure S3. Mean bar graph data for (±)-sorocenol B.



#### IV. Select NMR Spectra

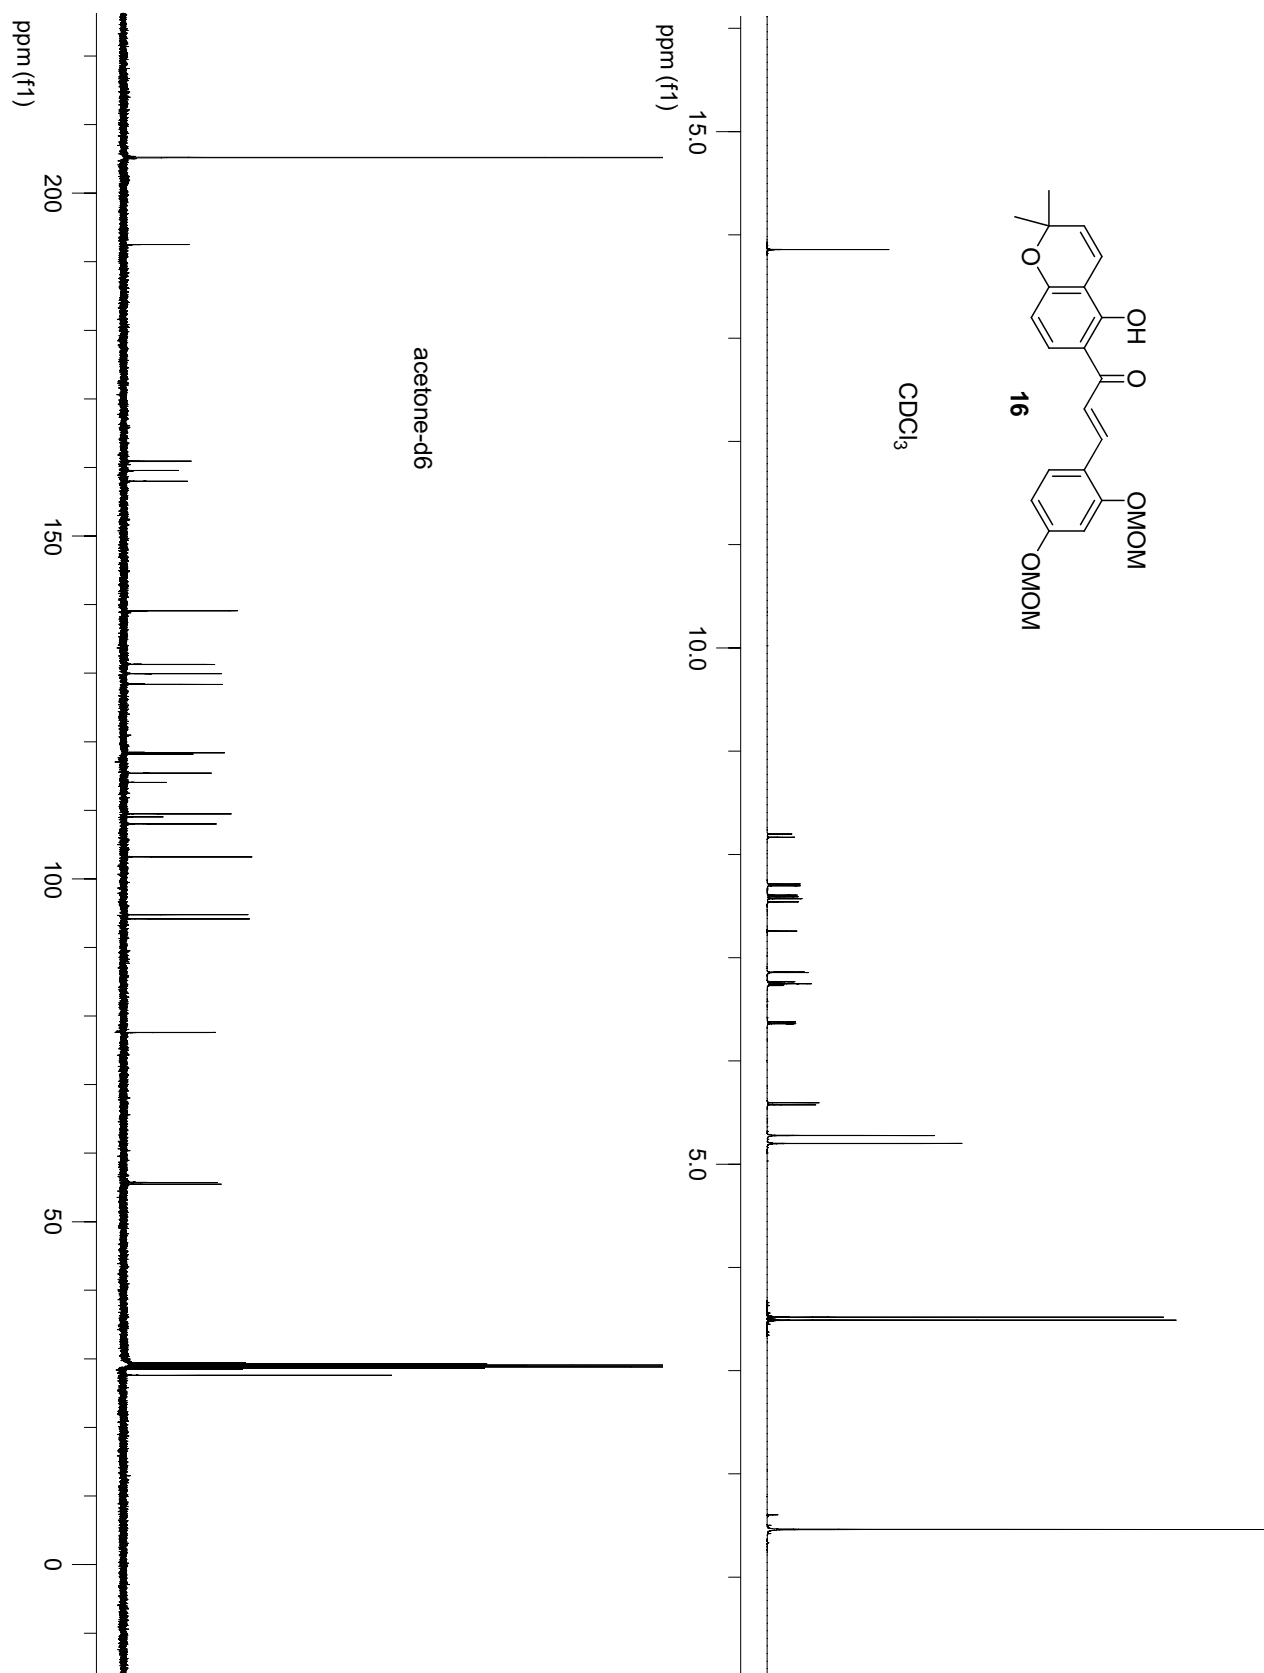

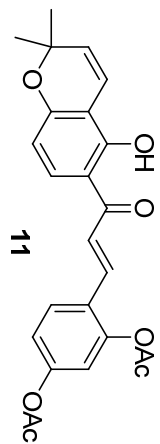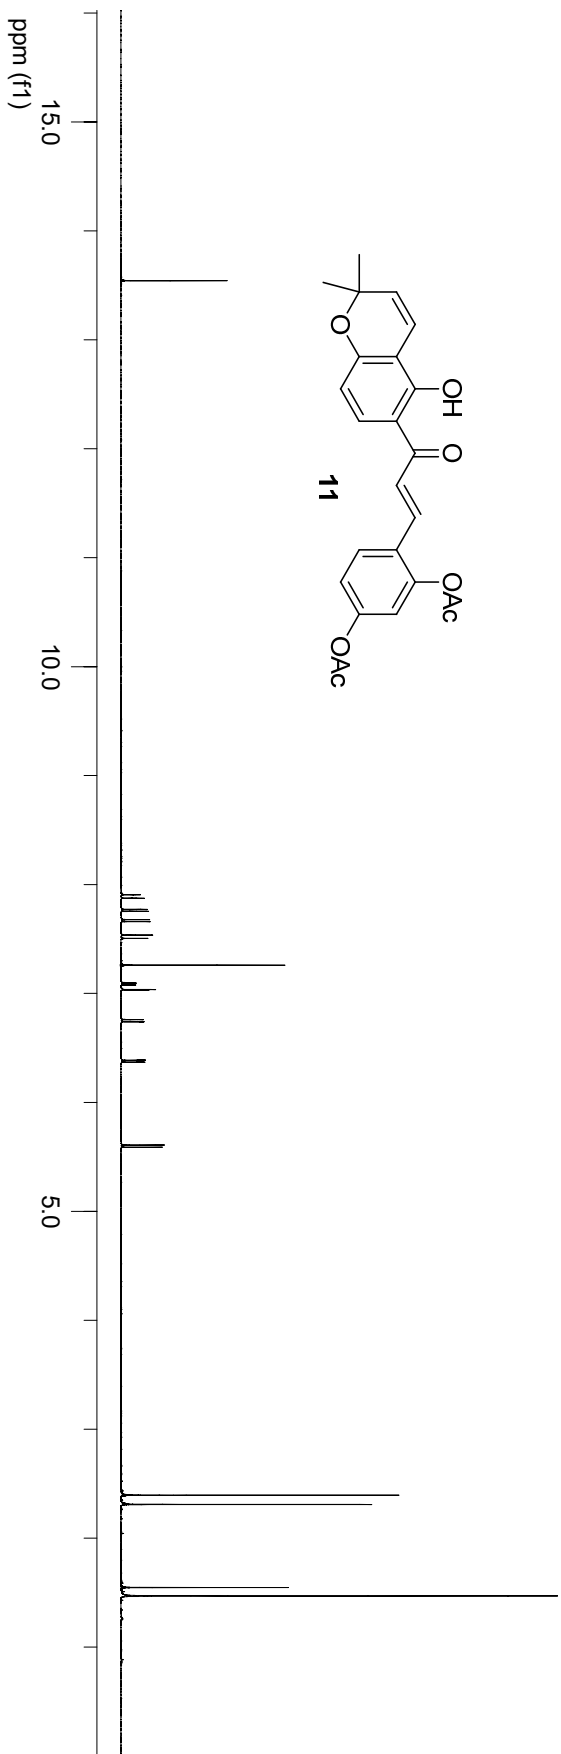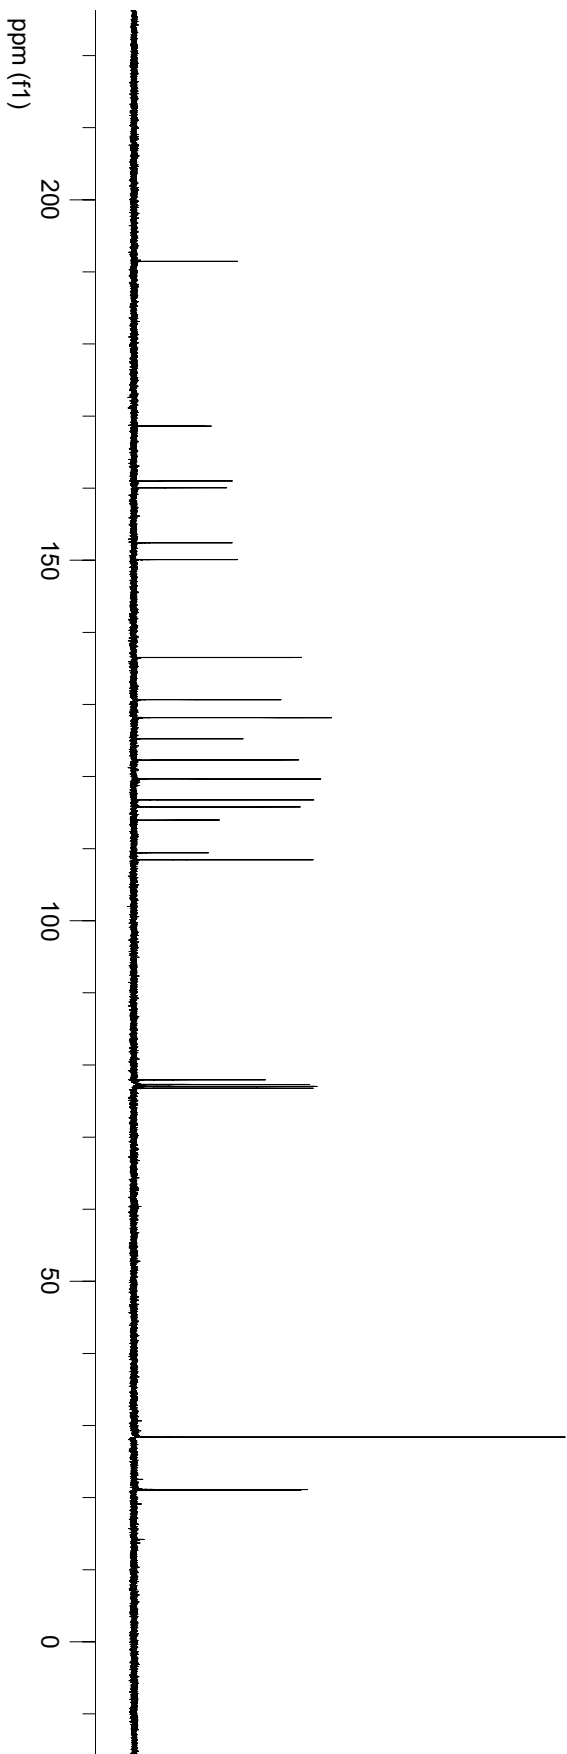

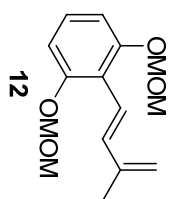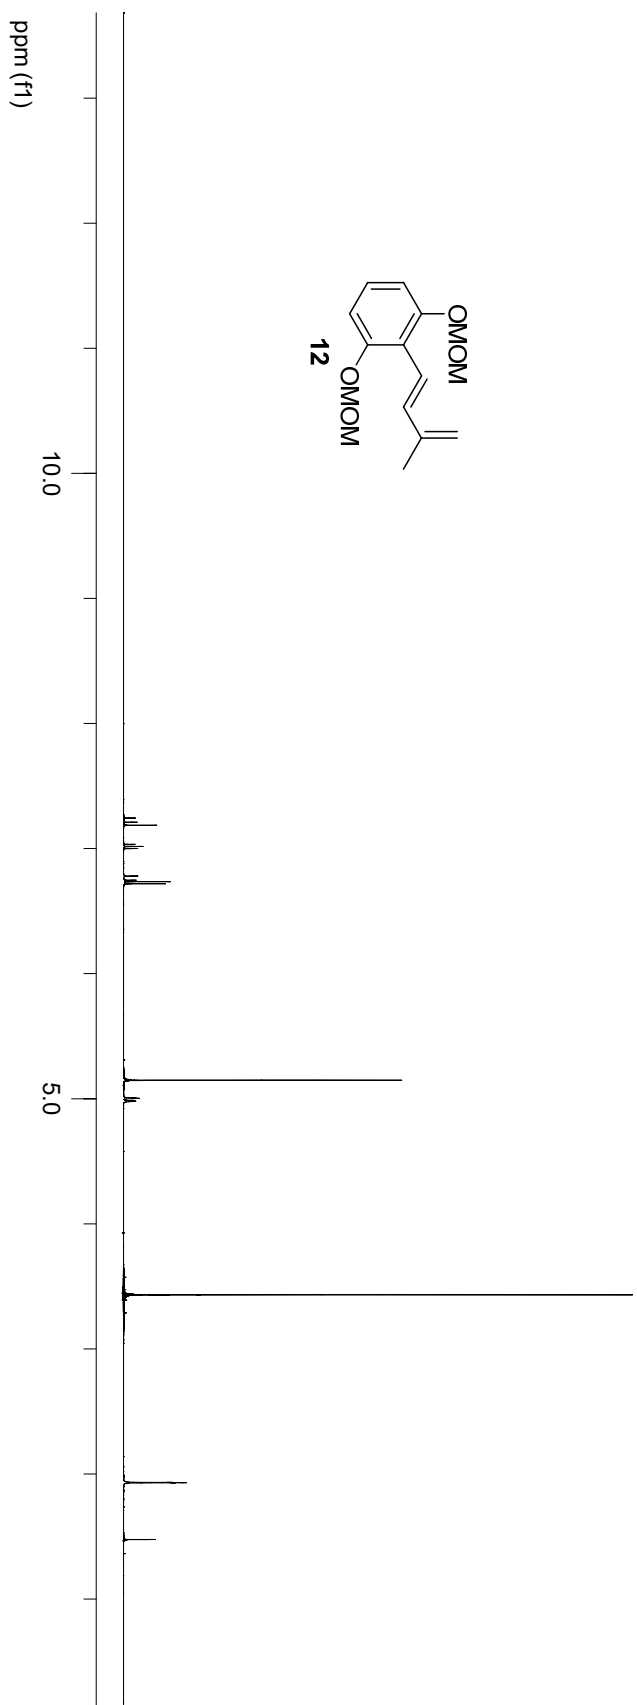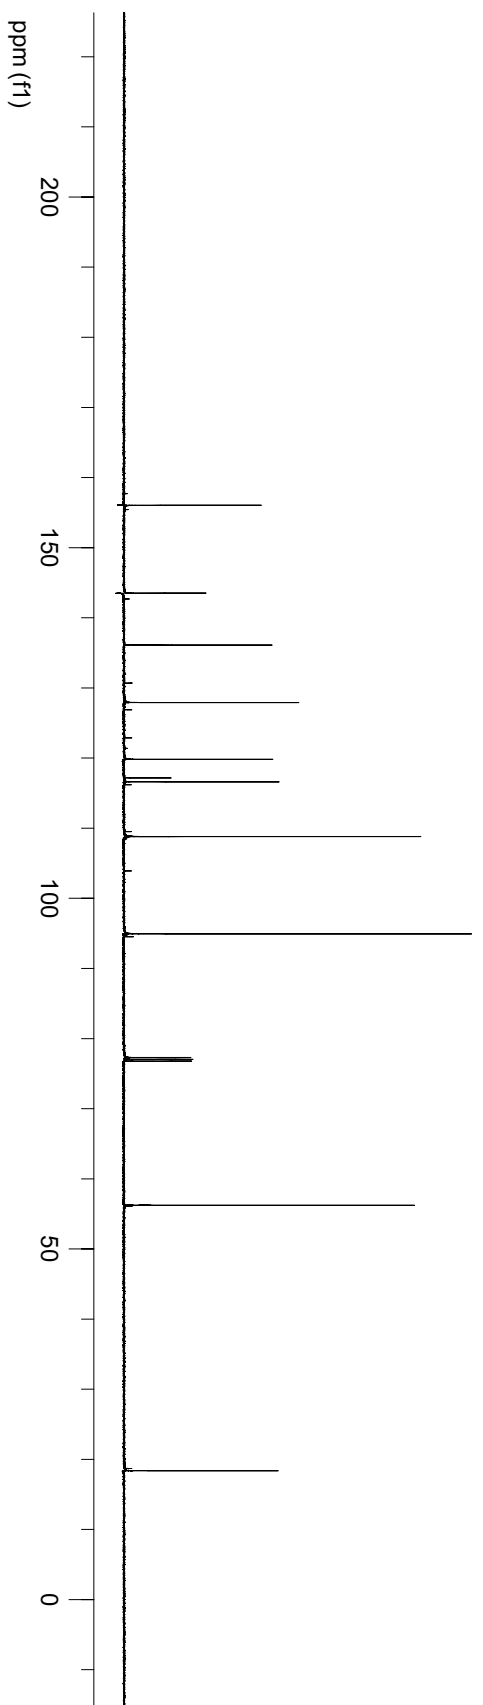

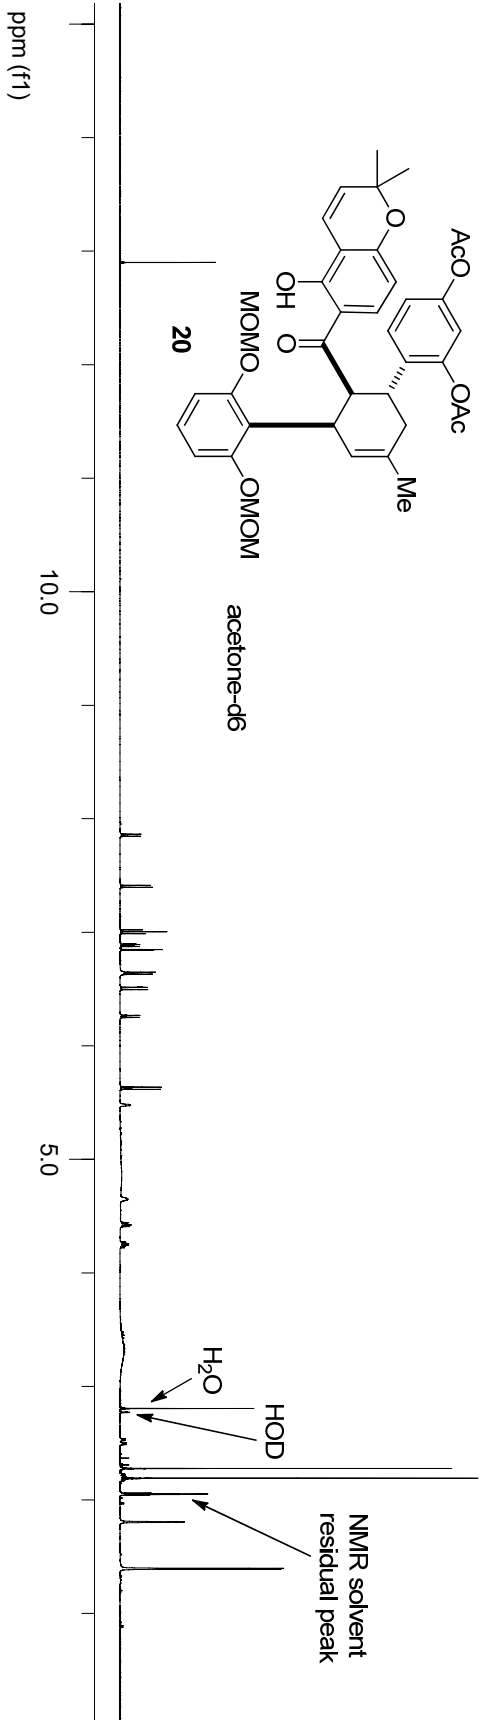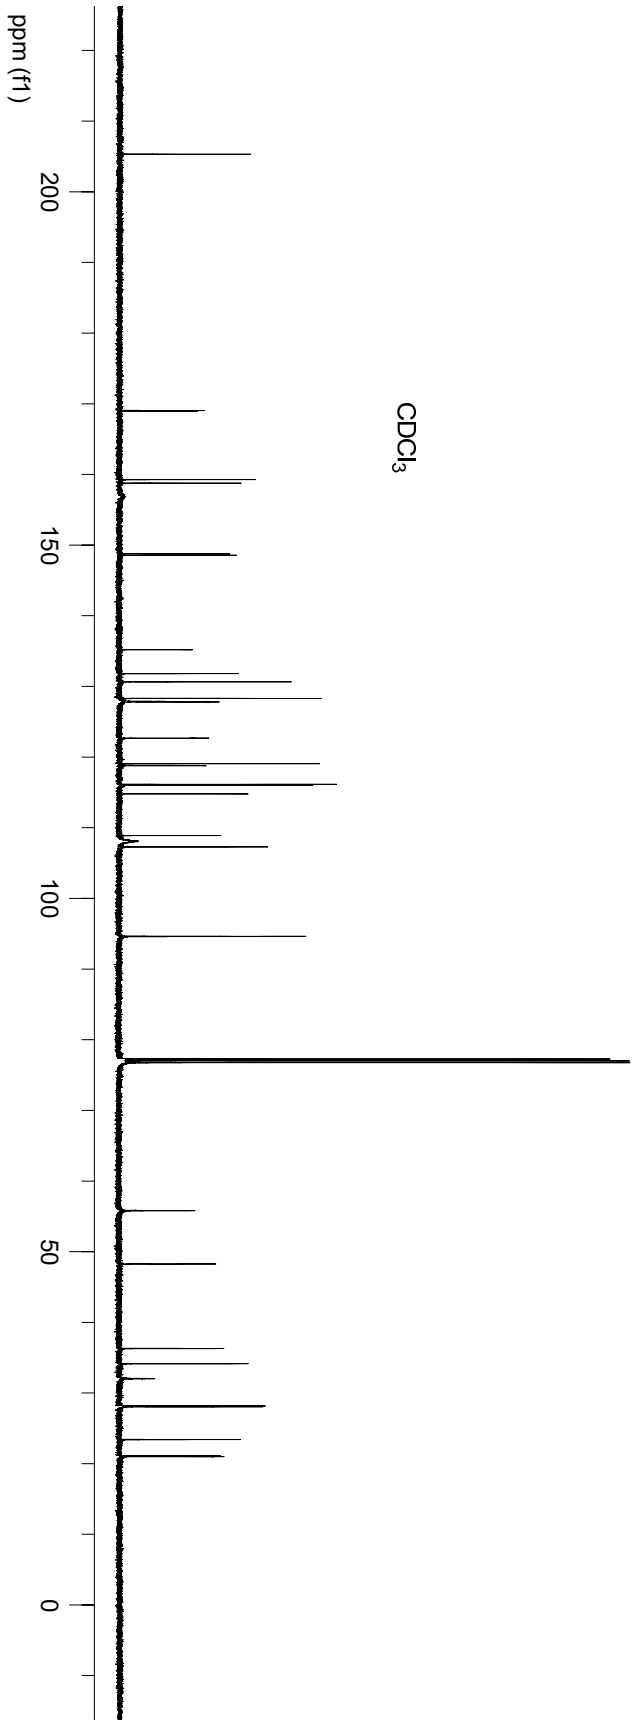

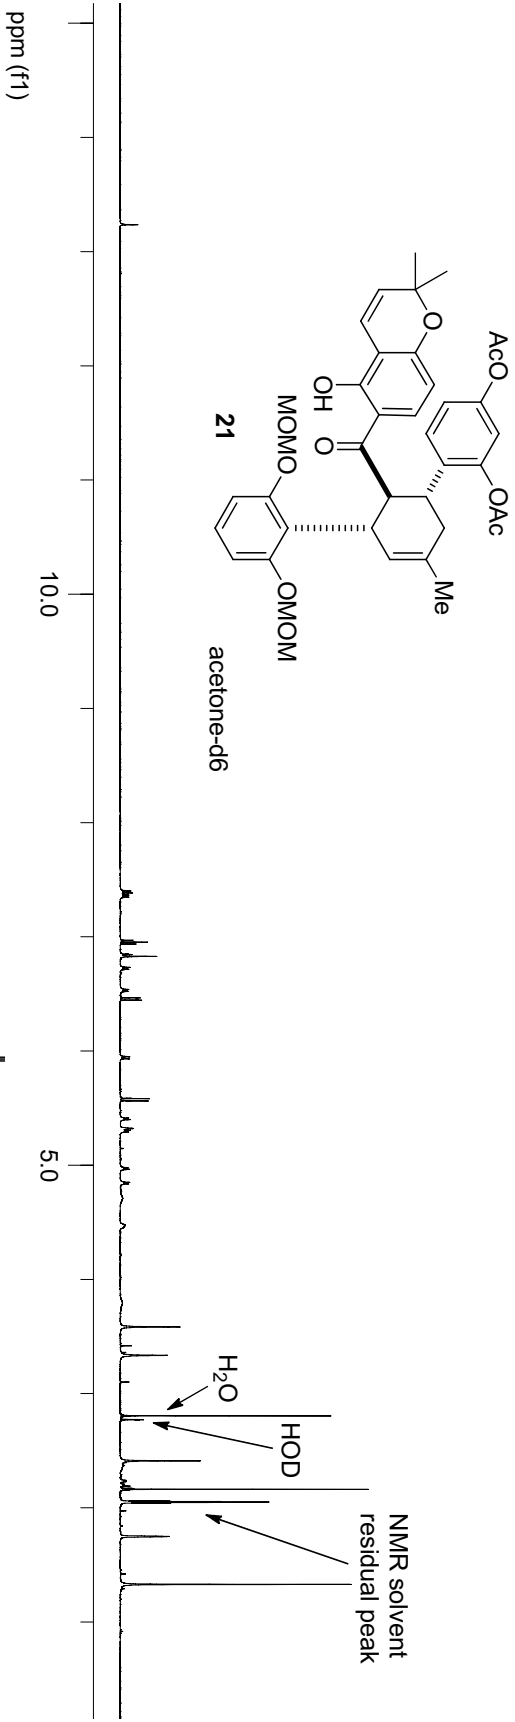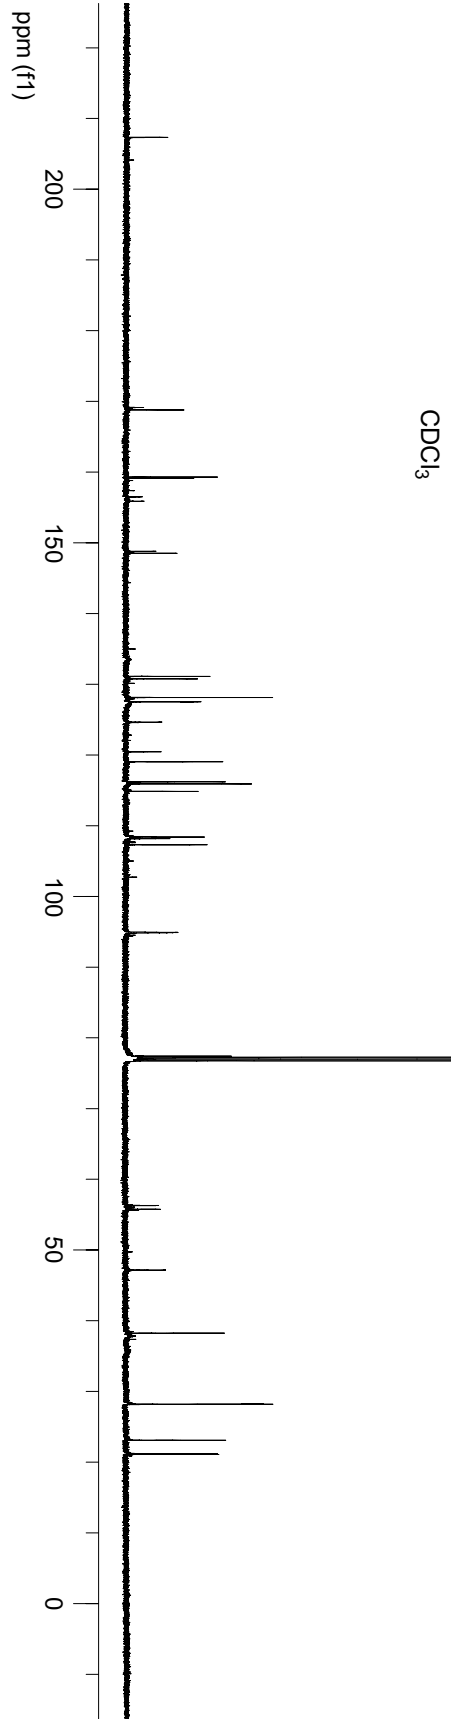

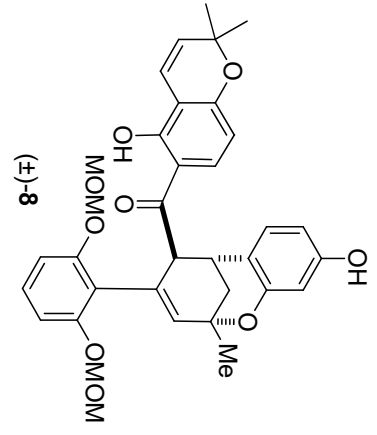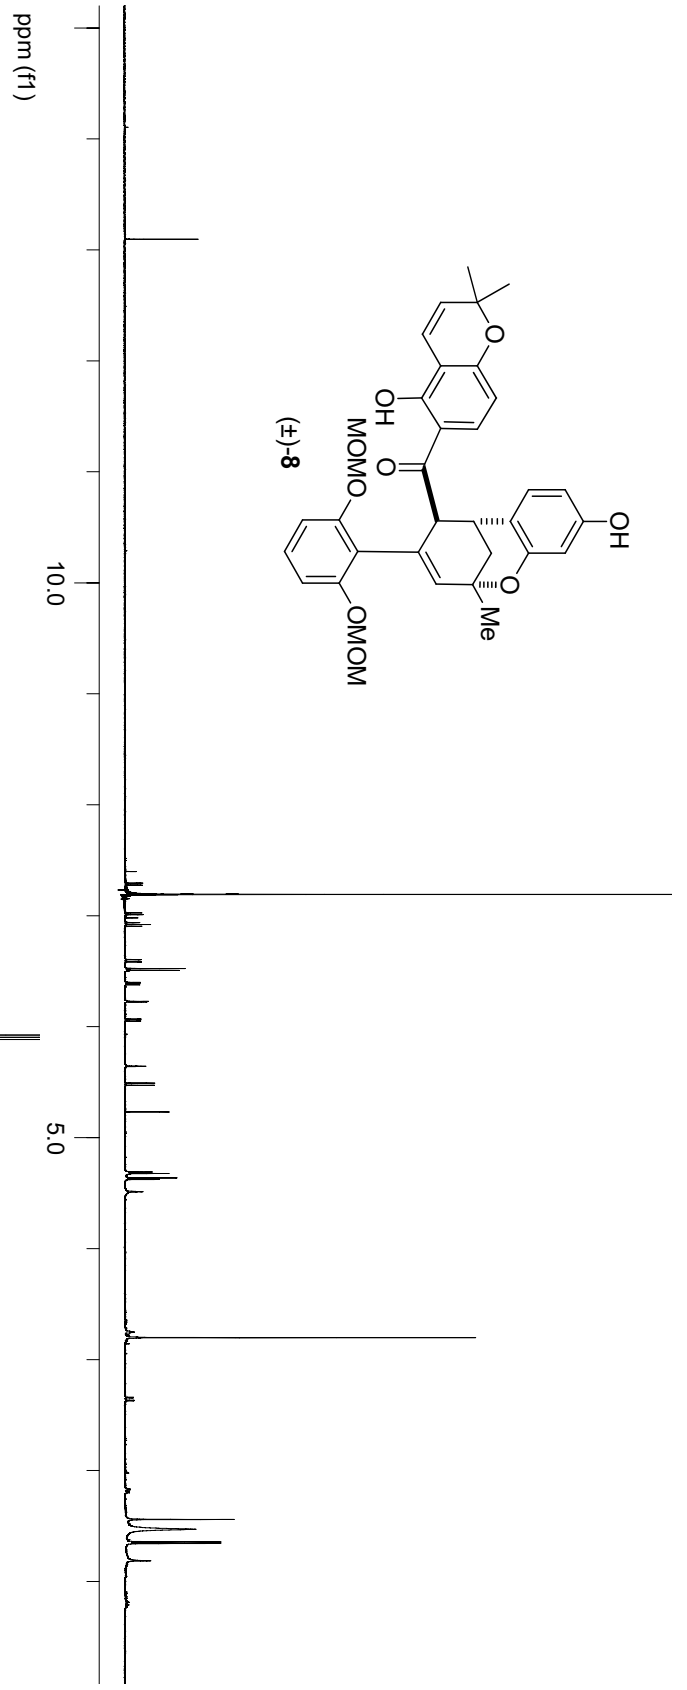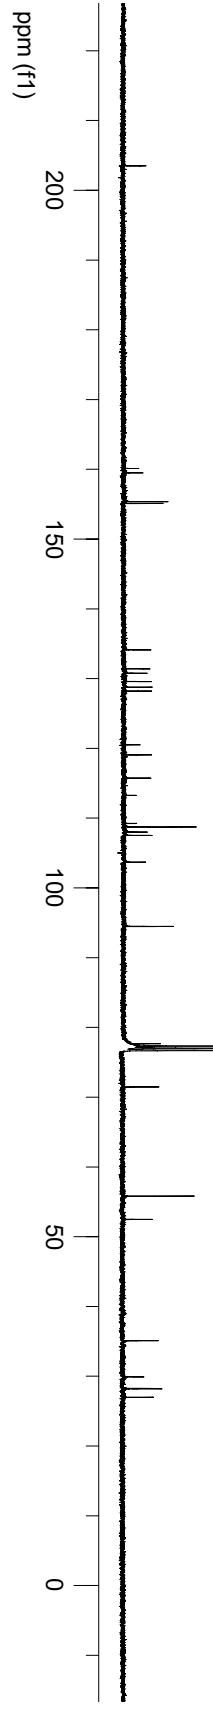

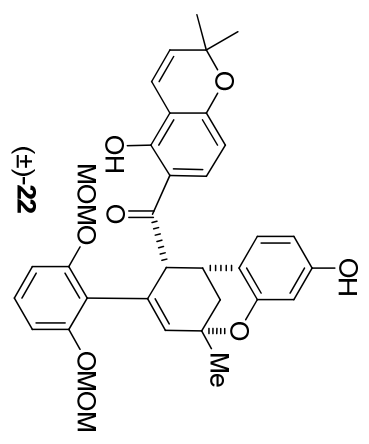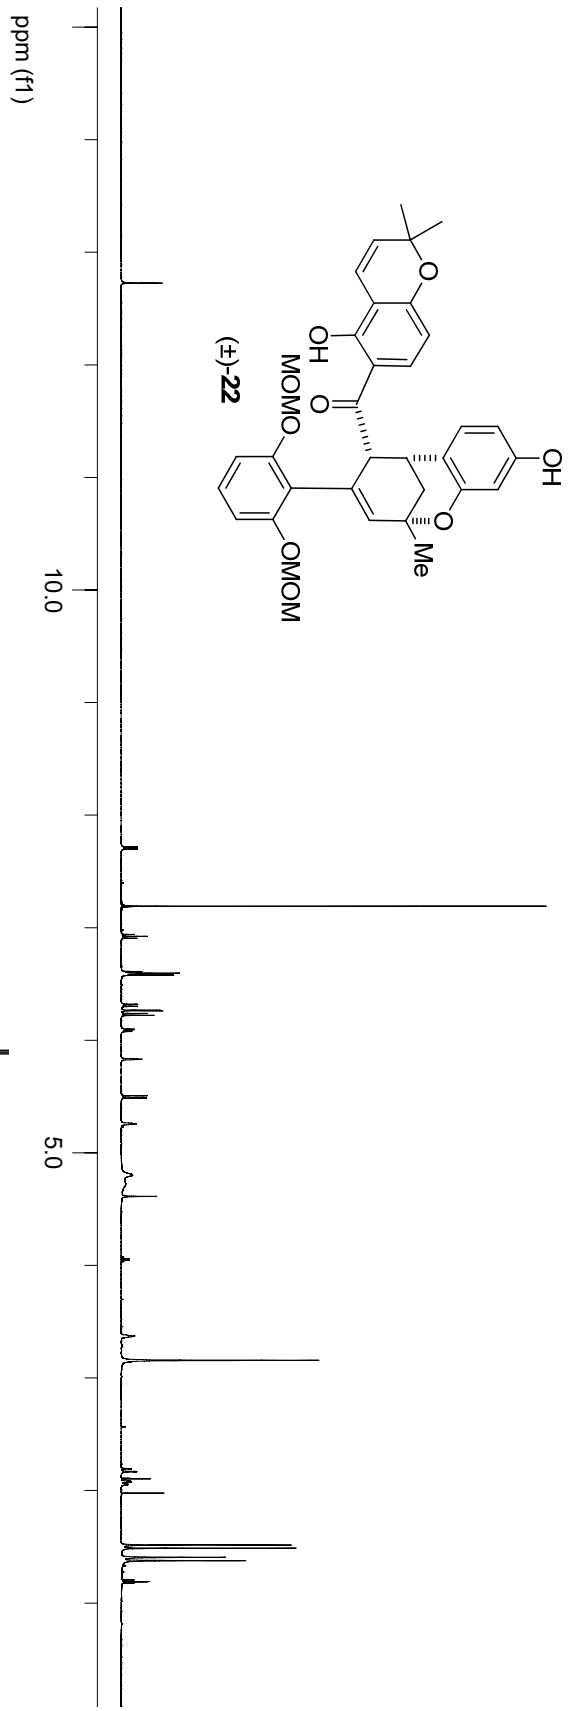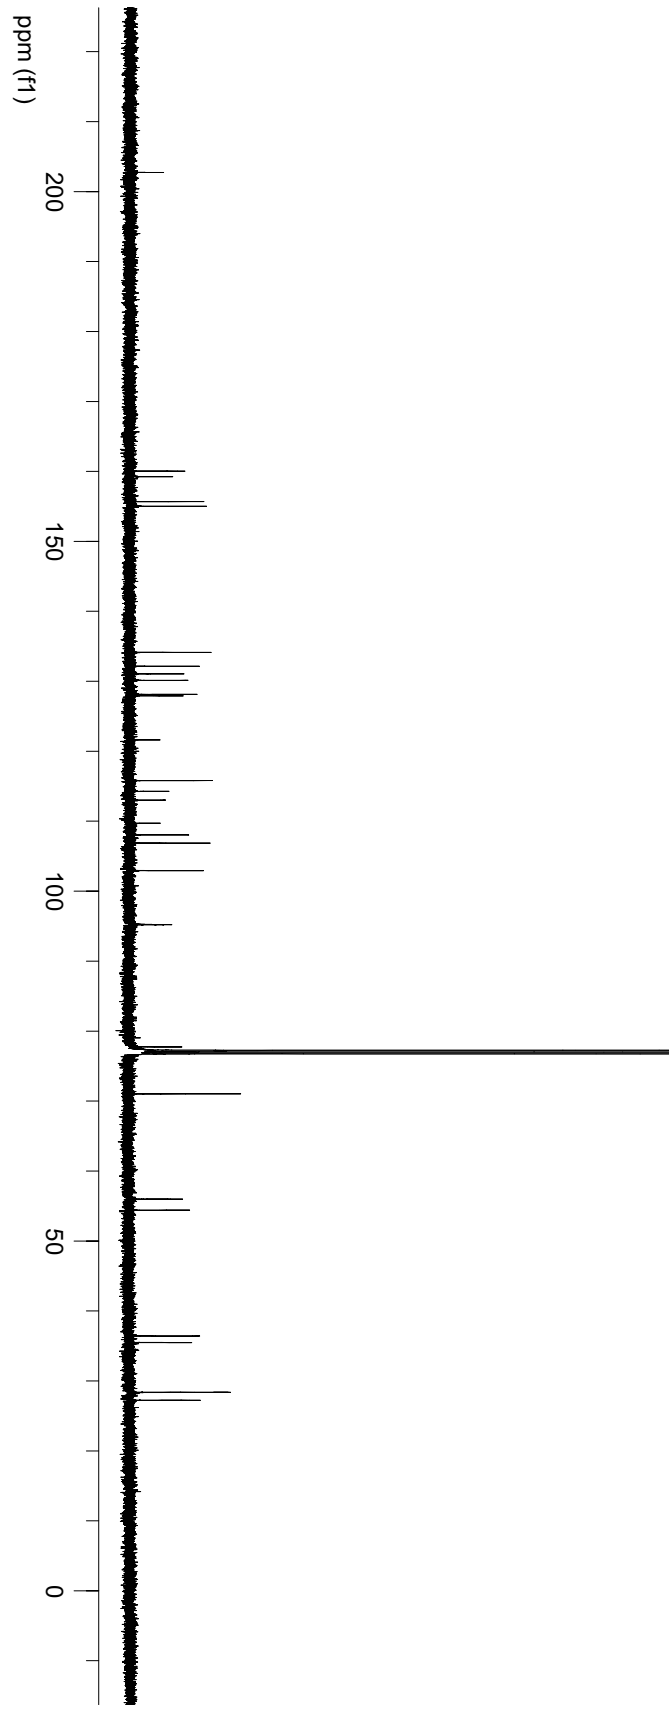

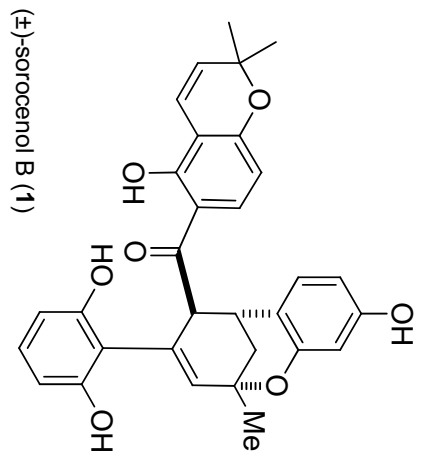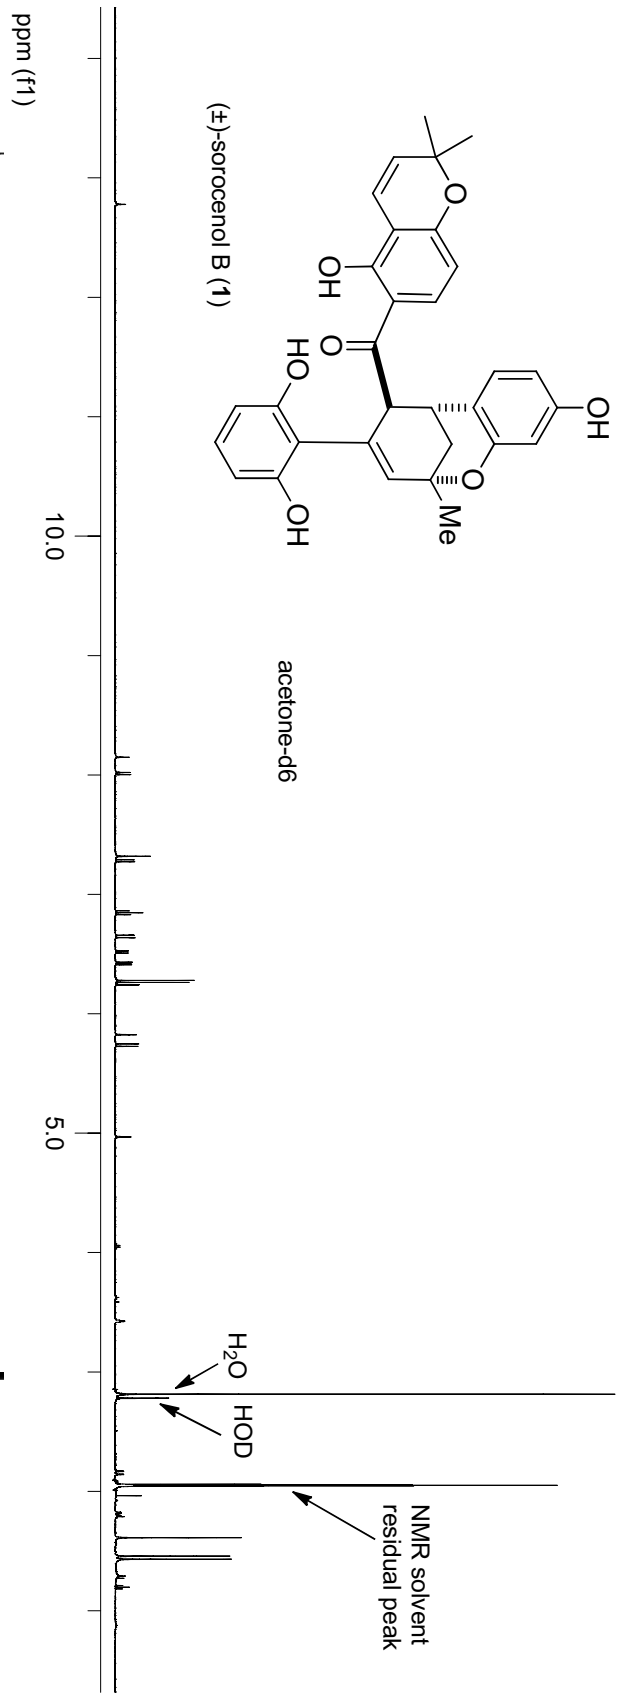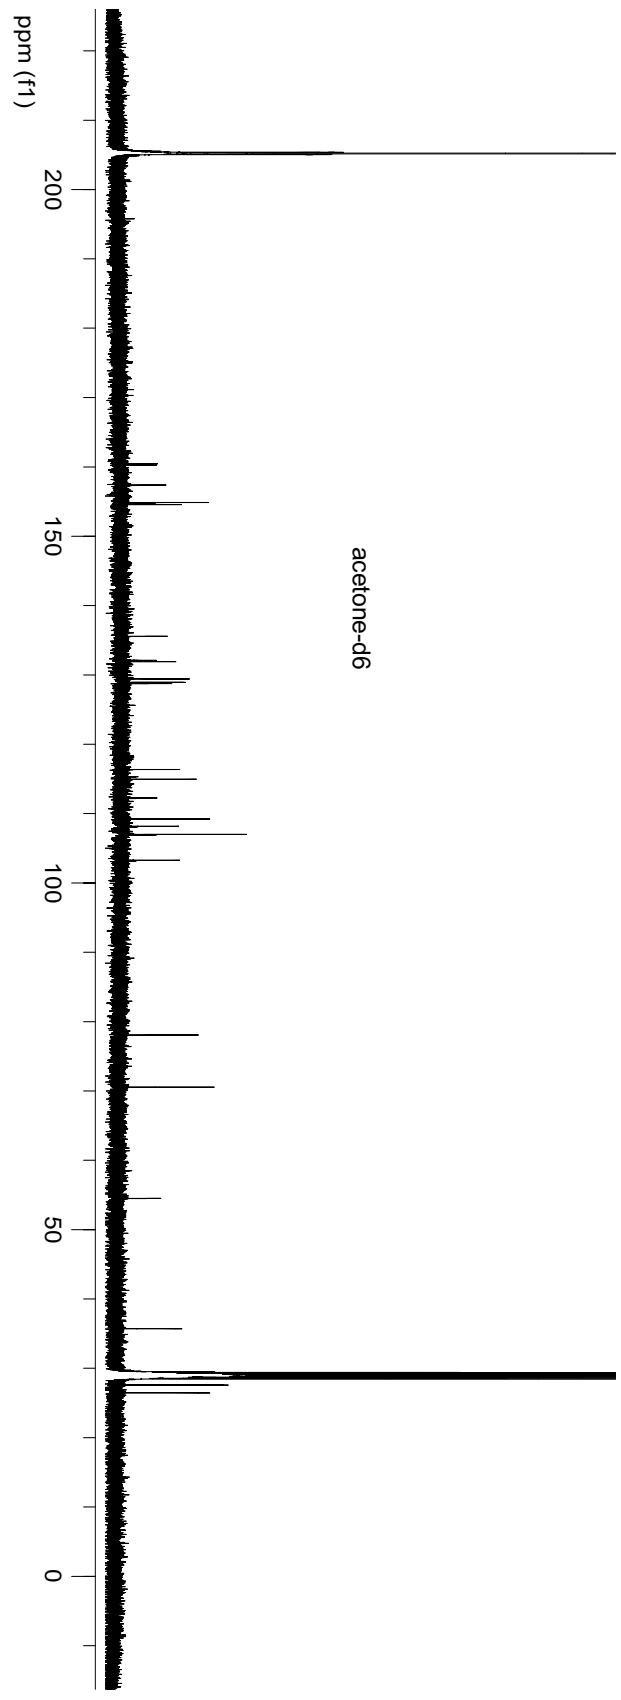

Supplement: NIHMS375191-supplement-1_si_001.pdf [file NIHMS375191-supplement-1_si_001.pdf]
